# Supplementary material
Source: HighWire-hosted journal article supplement (https://emboj.embopress.org/content/25/5/1160)
Supplement: inline-supplementary-material-5 [file inline-supplementary-material-5.pdf]

## Table S5

| Gene category 3<br>ENSEMBL_gene_id | Glomerulus cDNA clones<br>ENSEMBL_gene_name                                                                 | Clone_id            | log2(glo/rest_kidney) | Pvalue1  | log2(glo/brain_capillary) | Pvalue2 |
|------------------------------------|-------------------------------------------------------------------------------------------------------------|---------------------|-----------------------|----------|---------------------------|---------|
| 1 ENSMUSG00000026449               | Renin 1 precursor (EC 3.4.23.15) (Angiotensinogenase) (Kidney renin). [Source:UniProt/SWISSPROT;Acc:Q91X05] | gbct104_plate17_F20 | 3.06                  | 0.00307  | 5.79                      | 0.00002 |
| 2 ENSMUSG00000026602               | Podocin. [Source:UniProt/SWISSPROT;Acc:Q91X05]                                                              | MTG_602471477       | 3.4                   | 0.00272  | 5.08                      | 0.00002 |
| 3 ENSMUSG00000016458               | Wilms' tumor protein homolog. [Source:UniProt/SWISSPROT;Acc:P22561]                                         | gbct104_plate4_A_12 | 2.08                  | 0.01102  | 5.47                      | 0.00002 |
| 4 ENSMUSG00000006649               | Nephrin precursor (Renal glomerulus-specific cell adhesion receptor). [Source:UniProt/SWISSPROT;Acc:Q91X05] | gbct104_plate13_G16 | 2.97                  | 0.00239  | 4.2                       | 0.00019 |
| 5 ENSMUSG00000030223               | protein tyrosine phosphatase, receptor type, O. [Source:RefSeq;Acc:NM_011216]                               | MTG_602467963       | 2.43                  | 0.00467  | 4.55                      | 0.00001 |
| 6 ENSMUSG00000036390               | Growth arrest and DNA-damage-inducible protein GADD45 alpha (DNA- damage inc                                | MTG_602468308       | 2.48                  | 0.00451  | 4.28                      | 0.00002 |
| 7 ENSMUSG00000050010               |                                                                                                             | MTG_602138918       | 2.03                  | 0.0096   | 4.34                      | 0.00016 |
| 8 ENSMUSG00000024921               |                                                                                                             | MTG_602471205       | 2.41                  | 0.00756  | 3.91                      | 0.00016 |
| 9 ENSMUSG00000024065               |                                                                                                             | MTG_602467884       | 2.9                   | 0.00378  | 3.36                      | 0.00018 |
| 10 ENSMUSG00000030717              | Nuclear protein 1 (Protein p8). [Source:UniProt/SWISSPROT;Acc:Q9WTK0]                                       | gbct104_plate9_C21  | 2.77                  | 0.01335  | 3.44                      | 0.00077 |
| 11 ENSMUSG00000037664              | Cyclin-dependent kinase inhibitor 1C (Cyclin-dependent kinase inhibitor p57) (p57Kl                         | gbct104_plate3_K18  | 2.88                  | 0.00264  | 3.31                      | 0.00002 |
| 12 ENSMUSG00000030513              | PACE4A (Fragment). [Source:UniProt/SPTREMBL;Acc:Q62030]                                                     | MTG_602475863       | 1.82                  | 0.00436  | 4.23                      | 0.00001 |
| 13 ENSMUSG00000059213              | MKIAA0749 protein (Fragment). [Source:UniProt/SPTREMBL;Acc:Q80TS7]                                          | MTG_602467382       | 1.92                  | 0.00467  | 4.12                      | 0.00058 |
| 14 ENSMUSG00000021904              |                                                                                                             | MTG_602468143       | 2.99                  | 0.00239  | 2.83                      | 0.00011 |
| 15 ENSMUSG00000046714              | Forkhead box protein C2 (Forkhead-related protein FKHL14) (Mesenchyme fork hea                              | gbct104_plate17_L12 | 2.66                  | 0.00272  | 3.14                      | 0.00055 |
| 16 ENSMUSG00000043079              | Synaptopodin. [Source:UniProt/SWISSPROT;Acc:Q8CC35]                                                         | MTG_602138940       | 2.91                  | 0.00258  | 2.84                      | 0.00067 |
| 17 ENSMUSG00000029061              | matrix metalloproteinase 23; cysteine array matrix metalloproteinase. [Source:RefSe                         | gbct104_plate17_D12 | 2.09                  | 0.00272  | 3.55                      | 0.00043 |
| 18 ENSMUSG00000026185              | Insulin-like growth factor binding protein 5 precursor (IGFBP-5) (IBP- 5) (IGF-binding                      | MTG_602468305       | 1.83                  | 0.00239  | 3.78                      | 0.00001 |
| 19 ENSMUSG00000035333              | protease inhibitor 15; cysteine-rich secreted protein. [Source:RefSeq;Acc:NM_05319                          | MTG_602472831       | 1.68                  | 0.00541  | 3.85                      | 0.00002 |
| 20 ENSMUSG00000033502              | Dual-specificity phosphatase homolog (Fragment). [Source:UniProt/SPTREMBL;Acc:                              | MTG_602476009       | 1.89                  | 0.01032  | 3.49                      | 0.00005 |
| 21 ENSMUSG00000034111              | Ras-related protein Rab-3B. [Source:UniProt/SWISSPROT;Acc:Q9CZT8]                                           | gbct104_plate7_I24  | 2.25                  | 0.00239  | 3.08                      | 0.00031 |
| 22 ENSMUSG00000022580              | Rhopilin 1 (GTP-Rho binding protein 1). [Source:UniProt/SWISSPROT;Acc:Q61085                                | MTG_602470139       | 2.44                  | 0.00272  | 2.86                      | 0.00167 |
| 23 ENSMUSG00000025810              | Neuropilin-1 precursor (A5 protein). [Source:UniProt/SWISSPROT;Acc:P97333]                                  | gbct104_plate6_O15  | 2.54                  | 0.00457  | 2.72                      | 0.00030 |
| 24 ENSMUSG00000015093              | Chloride intracellular channel protein 3. [Source:UniProt/SWISSPROT;Acc:Q9D7P7]                             | gbct104_plate13_A02 | 2.71                  | 0.00358  | 2.44                      | 0.00784 |
| 25 ENSMUSG00000027996              | secreted frizzled-related sequence protein 2; stromal cell derived factor 5; secreted fi                    | gbct104_plate14_O17 | 1.49                  | 0.01206  | 3.63                      | 0.00029 |
| 26 ENSMUSG00000035929              | H-2 class I histocompatibility antigen, Q10 alpha chain precursor. [Source:UniProt/S                        | MTG_602139046       | 2.47                  | 0.01132  | 2.64                      | 0.00689 |
| 27 ENSMUSG00000027210              | Homeobox protein Meis2 (Meis1-related protein 1). [Source:UniProt/SWISSPROT;Ac                              | MTG_602139087       | 1.61                  | 0.00302  | 3.49                      | 0.00004 |
| 28 ENSMUSG00000026768              | integrin alpha 8. [Source:RefSeq;Acc:NM_001001309]                                                          | MTG_602467867       | 1.95                  | 0.01076  | 3.01                      | 0.00564 |
| 29 ENSMUSG00000022206              | Atrial natriuretic peptide clearance receptor precursor (ANP-C) (ANPRC) (NPR-C) (A                          | MTG_602310638       | 2.56                  | 0.00307  | 2.29                      | 0.00053 |
| 30 ENSMUSG00000064196              |                                                                                                             | gbct104_plate10_H24 | 2.22                  | 0.00239  | 2.49                      | 0.01820 |
| 31 ENSMUSG00000028031              | Dickkopf related protein-2 precursor (Dkk-2) (Dickkopf-2) (mDkk-2). [Source:UniProt/                        | gbct104_plate15_H23 | 2.64                  | 0.00373  | 1.98                      | 0.04230 |
| 32 ENSMUSG00000062515              | Fatty acid-binding protein, adipocyte (AFABP) (Adipocyte lipid-binding protein) (ALBI                       | MTG_602474869       | 1.47                  | 0.01581  | 3.12                      | 0.00092 |
| 33 ENSMUSG00000020552              | D-glycosaminyl 3-O-sulfotransferase-3B. [Source:RefSeq;Acc:NM_018805]                                       | gbct104_plate16_J03 | 1.38                  | 0.04309  | 3.19                      | 0.00040 |
| 34 ENSMUSG00000023959              | Chloride intracellular channel protein 5. [Source:UniProt/SWISSPROT;Acc:Q8BXK9]                             | MTG_602468931       | 1.76                  | 0.00423  | 2.8                       | 0.00129 |
| 35 ENSMUSG00000033060              |                                                                                                             | MTG_602472430       | 1.31                  | 0.0048   | 3.2                       | 0.00045 |
| 36 ENSMUSG00000025608              | Podocalyxin-like protein 1 precursor. [Source:UniProt/SWISSPROT;Acc:Q9R0M4]                                 | MTG_602468601       | 2.2                   | 0.00265  | 2.26                      | 0.00167 |
| 37 ENSMUSG000000057123             | Gap junction alpha-5 protein (Connexin 40) (Cx40). [Source:UniProt/SWISSPROT;Ac                             | MTG_602477362       | 2.35                  | 0.01206  | 2.11                      | 0.00217 |
| 38 ENSMUSG00000056492              |                                                                                                             | MTG_602473220       | 2.51                  | 0.00272  | 1.83                      | 0.00167 |
| 39 ENSMUSG00000029641              |                                                                                                             | MTG_602476673       | 1.67                  | 0.00264  | 2.66                      | 0.00029 |
| 40 ENSMUSG00000032679              | CD59A glycoprotein precursor (Membrane attack complex inhibition factor) (MACIF)                            | MTG_602477476       | 1.72                  | 0.00272  | 2.59                      | 0.00048 |
| 41 ENSMUSG000000008384             | SERTA domain-containing protein 1 (Transcriptional regulator interacting with the P-                        | MTG_602472022       | 1.88                  | 0.0468   | 2.42                      | 0.00134 |
| 42 ENSMUSG00000054690              | endomucin; mucin 14, endothelial. [Source:RefSeq;Acc:NM_016885]                                             | gbct104_plate14_M07 | 2.38                  | 0.00339  | 1.85                      | 0.00235 |
| 43 ENSMUSG00000018899              | Interferon regulatory factor 1 (IRF-1). [Source:UniProt/SWISSPROT;Acc:P15314]                               | MTG_602473423       | 1.04                  | 0.01018  | 3.18                      | 0.00234 |
| 44 ENSMUSG00000038831              | Ral guanine nucleotide exchange factor RalGPS1A. [Source:RefSeq;Acc:NM_17521                                | gbct104_plate3_I06  | 1.96                  | 0.00264  | 2.16                      | 0.00496 |
| 45 ENSMUSG00000039910              | Cbp/p300-interacting transactivator 2 (MSG-related protein 1) (MRG1 protein). [Sou                          | gbct104_plate15_M02 | 1.62                  | 0.02959  | 2.46                      | 0.00055 |
| 46 ENSMUSG00000004105              | Angiopietin-related protein 2 precursor (Angiopietin-like 2). [Source:UniProt/SWIS                          | MTG_602467989       | 1.7                   | 0.00239  | 2.32                      | 0.00033 |
| 47 ENSMUSG00000020431              | Adenylyl cyclase type I (EC 4.6.1.1) (Fragment). [Source:UniProt/SPTREMBL;Acc:O:                            | MTG_602477447       | 1.53                  | 0.002723 | 2.45                      | 0.00376 |
| 48 ENSMUSG00000029273              | sulfotransferase family 1D, member 1; amine N-sulfotransferase; tyrosine-ester sulfo                        | MTG_602469455       | 1.3                   | 0.00418  | 2.66                      | 0.00032 |
| 49 ENSMUSG00000027834              | Neuroserpin precursor (Protease inhibitor 17). [Source:UniProt/SWISSPROT;Acc:O3                             | MTG_602467339       | 1.95                  | 0.00453  | 1.98                      | 0.00365 |
| 50 ENSMUSG00000018411              | Microtubule-associated protein tau (Neurofibrillary tangle protein) (Paired helical filan                   | MTG_602474179       | 1.8                   | 0.00264  | 2.12                      | 0.00129 |
| 51 ENSMUSG00000026305              | leucine rich repeat (in FLII) interacting protein 1; FLAP (FLI LRR associated protein).                     | gbct104_plate11_P06 | 1.18                  | 0.04727  | 2.67                      | 0.01920 |
| 52 ENSMUSG00000026817              | Adenylate kinase isoenzyme 1 (EC 2.7.4.3) (ATP-AMP transphosphorylase) (AK1) (M                             | MTG_602470558       | 1.4                   | 0.03148  | 2.41                      | 0.00673 |
| 53 ENSMUSG00000031029              | Eukaryotic translation initiation factor 3 subunit 5 (eIF-3 epsilon) (eIF3 p47 subunit) (                   | MTG_602471221       | 1.86                  | 0.00816  | 1.91                      | 0.04660 |
| 54 ENSMUSG00000020458              | Reticulon 4 (Neurite outgrowth inhibitor) (Nogo protein). [Source:UniProt/SWISSPRC                          | gbct104_plate17_A09 | 1.5                   | 0.01599  | 2.25                      | 0.00034 |

|     |                     |                                                                                                                          |                     |      |         |      |         |
|-----|---------------------|--------------------------------------------------------------------------------------------------------------------------|---------------------|------|---------|------|---------|
| 55  | ENSMUSG00000048376  | Proteinase activated receptor 1 precursor (PAR-1) (Thrombin receptor). [Source:UniProt/SWISSPROT;Acc:Q7TPD3]             | MTG_602470037       | 2.17 | 0.00358 | 1.58 | 0.03660 |
| 56  | ENSMUSG00000052516  | Roundabout homolog 2 precursor. [Source:UniProt/SWISSPROT;Acc:Q7TPD3]                                                    | MTG_602470037       | 1.9  | 0.00436 | 1.83 | 0.01520 |
| 57  | ENSMUSG00000017446  | C1q and tumor necrosis factor related protein 1; putative secreted protein ZSIG37. [Source:UniProt/SWISSPROT;Acc:Q7TPD3] | MTG_602469925       | 2.29 | 0.00379 | 1.42 | 0.01160 |
| 58  | ENSMUSG00000024534  | synuclein, alpha interacting protein (synphilin); synphilin-1. [Source:RefSeq;Acc:NM_001080483]                          | MTG_602310659       | 1.25 | 0.02005 | 2.45 | 0.00029 |
| 59  | ENSMUSG00000031217  | Ephrin-B1 precursor (EPH-related receptor tyrosine kinase ligand 2) (LERK-2) (ELK-2)                                     | gbctl04_plate10_J04 | 1.5  | 0.01527 | 2.2  | 0.00163 |
| 60  | ENSMUSG00000035566  |                                                                                                                          | MTG_602477729       | 2.01 | 0.00415 | 1.69 | 0.01120 |
| 61  | ENSMUSG00000029887  |                                                                                                                          | MTG_602469530       | 1.28 | 0.01762 | 2.39 | 0.00433 |
| 62  | ENSMUSG00000050640  |                                                                                                                          | MTG_602474489       | 1.26 | 0.00345 | 2.41 | 0.00451 |
| 63  | ENSMUSG00000054435  | immune associated nucleotide 1 isoform b. [Source:RefSeq;Acc:NM_175048]                                                  | MTG_602472679       | 2.08 | 0.00436 | 1.59 | 0.00704 |
| 64  | ENSMUSG00000021759  | Lipid phosphate phosphohydrolase 1 (EC 3.1.3.4) (Phosphatidic acid phosphatase 2)                                        | MTG_602138959       | 1.94 | 0.01596 | 1.72 | 0.00313 |
| 65  | ENSMUSG00000018995  |                                                                                                                          | gbctl04_plate11_G20 | 1.54 | 0.0254  | 2.09 | 0.00562 |
| 66  | ENSMUSG00000050493  |                                                                                                                          | gbctl04_plate3_L03  | 1.74 | 0.01526 | 1.87 | 0.00997 |
| 67  | ENSMUSG00000018593  | SPARC precursor (Secreted protein acidic and rich in cysteine) (Osteonectin) (ON)                                        | MTG_602469065       | 1.42 | 0.00428 | 2.16 | 0.00062 |
| 68  | ENSMUSG00000028713  | Cytochrome P450 4B1 (EC 1.14.14.1) (CYP1B1). [Source:UniProt/SWISSPROT;Acc:Q7TPD3]                                       | gbctl04_plate9_A23  | 1.96 | 0.00272 | 1.61 | 0.00118 |
| 69  | ENSMUSG00000029211  | Gamma-aminobutyric-acid receptor alpha-4 subunit precursor (GABA(A) receptor). [Source:UniProt/SWISSPROT;Acc:Q7TPD3]     | gbctl04_plate12_P13 | 1.48 | 0.0096  | 2.08 | 0.02730 |
| 70  | ENSMUSG00000006403  | a disintegrin-like and metalloprotease (repolyisin type) with thrombospondin type 1 repeats                              | gbctl04_plate3_H19  | 1.59 | 0.03715 | 1.96 | 0.03540 |
| 71  | ENSMUSG00000020044  | Metalloproteinase inhibitor 3 precursor (TIMP-3) (Tissue inhibitor of metalloproteinases)                                | MTG_602468343       | 1.4  | 0.01188 | 2.15 | 0.01550 |
| 72  | ENSMUSG00000034786  | G-protein signalling modulator 3 (AGS3-like, C. elegans). [Source:RefSeq;Acc:NM_001080483]                               | gbctl04_plate13_G20 | 1.98 | 0.01229 | 1.57 | 0.00551 |
| 73  | ENSMUSG00000052131  | Aldose reductase-related protein 1 (EC 1.1.1.21) (AR) (Aldehyde reductase) (VAS)                                         | MTG_602472838       | 1.21 | 0.00563 | 2.33 | 0.00269 |
| 74  | ENSMUSG00000008136  | Skeletal muscle LIM-protein 3 (SLIM 3) (LIM-domain protein DRAL) (Four and a half LIM domains 3)                         | MTG_602469765       | 1.04 | 0.02239 | 2.49 | 0.00034 |
| 75  | ENSMUSG00000039503  |                                                                                                                          | gbctl04_plate13_N06 | 1.51 | 0.03356 | 2.02 | 0.02380 |
| 76  | ENSMUSG00000006205  | Serine protease HTRA1 precursor (EC 3.4.21.-). [Source:UniProt/SWISSPROT;Acc:Q7TPD3]                                     | MTG_602469553       | 2.37 | 0.00331 | 1.13 | 0.02290 |
| 77  | ENSMUSG00000017309  |                                                                                                                          | MTG_602471842       | 1.98 | 0.00239 | 1.49 | 0.01910 |
| 78  | ENSMUSG00000022272  |                                                                                                                          | MTG_602469704       | 1.78 | 0.02084 | 1.64 | 0.00929 |
| 79  | ENSMUSG00000057604  | LIM and cysteine-rich domains protein 1. [Source:UniProt/SWISSPROT;Acc:Q8VEE7]                                           | gbctl04_plate4_H19  | 1.01 | 0.01103 | 2.41 | 0.00335 |
| 80  | ENSMUSG00000031538  | Tissue-type plasminogen activator precursor (EC 3.4.21.68) (tPA) (t-plasminogen activator)                               | MTG_602138944       | 2.13 | 0.00415 | 1.27 | 0.01020 |
| 81  | ENSMUSG000000056501 | CCAAT/enhancer binding protein beta (C/EBP beta) (Interleukin-6 dependent binding protein 1)                             | MTG_602474692       | 1.44 | 0.03063 | 1.96 | 0.00097 |
| 82  | ENSMUSG00000032666  |                                                                                                                          | MTG_602474473       | 1.12 | 0.02045 | 2.26 | 0.00056 |
| 83  | ENSMUSG00000043298  |                                                                                                                          | MTG_602467115       | 1.38 | 0.01682 | 1.98 | 0.00096 |
| 84  | ENSMUSG00000027800  | Transmembrane 4 superfamily member 1 (Tumor-associated antigen L6) (Membrane protein L6)                                 | gbctl04_plate10_O12 | 1.79 | 0.00958 | 1.56 | 0.00355 |
| 85  | ENSMUSG00000005501  | Ubiquitin carboxyl-terminal hydrolase 40 (EC 3.1.2.15) (Ubiquitin thiolesterase 40) (L)                                  | gbctl04_plate11_P15 | 1.72 | 0.00378 | 1.61 | 0.00653 |
| 86  | ENSMUSG00000051978  |                                                                                                                          | MTG_602467162       | 1.46 | 0.00765 | 1.86 | 0.00917 |
| 87  | ENSMUSG00000021453  | Growth arrest and DNA-damage-inducible protein GADD45 gamma (Cytokine response protein 1)                                | MTG_602467360       | 1.67 | 0.02043 | 1.65 | 0.01120 |
| 88  | ENSMUSG00000011263  |                                                                                                                          | MTG_602467554       | 1.82 | 0.00239 | 1.49 | 0.02220 |
| 89  | ENSMUSG000000026152 | procollagen, type IV, alpha 3. [Source:RefSeq;Acc:NM_007734]                                                             | gbctl04_plate6_O08  | 1.57 | 0.00406 | 1.74 | 0.00601 |
| 90  | ENSMUSG00000030127  | COP9 (constitutive photomorphogenic) homolog, subunit 7a; COP9 (constitutive photomorphogenic) homolog, subunit 7b       | MTG_602471313       | 1.51 | 0.01359 | 1.8  | 0.00164 |
| 91  | ENSMUSG00000025402  | NGFI-A binding protein 2 (EGR-1 binding protein 2). [Source:UniProt/SWISSPROT;Acc:Q7TPD3]                                | MTG_602477020       | 1.06 | 0.00678 | 2.22 | 0.00017 |
| 92  | ENSMUSG00000015568  | Lipoprotein lipase precursor (EC 3.1.1.34) (LPL). [Source:UniProt/SWISSPROT;Acc:Q7TPD3]                                  | MTG_602475573       | 1.09 | 0.01788 | 2.15 | 0.00040 |
| 93  | ENSMUSG00000026249  | Glia derived nexin precursor (GDN) (Protease nexin I) (PN-1) (Serine protease-inhibitor)                                 | MTG_602468479       | 1.88 | 0.00297 | 1.36 | 0.00414 |
| 94  | ENSMUSG00000032625  |                                                                                                                          | MTG_602477667       | 1.47 | 0.01076 | 1.77 | 0.00868 |
| 95  | ENSMUSG00000035441  |                                                                                                                          | MTG_602139038       | 1.32 | 0.00418 | 1.92 | 0.00067 |
| 96  | ENSMUSG00000051855  | mesoderm specific transcript; EST AI256745. [Source:RefSeq;Acc:NM_008590]                                                | gbctl04_plate8_I13  | 1.21 | 0.01934 | 2.03 | 0.00563 |
| 97  | ENSMUSG00000022231  | Semaphorin 5A precursor (Semaphorin F) (Sema F). [Source:UniProt/SWISSPROT;Acc:Q7TPD3]                                   | gbctl04_plate17_H13 | 1.05 | 0.00574 | 2.16 | 0.00730 |
| 98  | ENSMUSG00000040260  | Disheveled associated activator of morphogenesis 2. [Source:UniProt/SWISSPROT;Acc:Q7TPD3]                                | gbctl04_plate5_C02  | 1.48 | 0.00264 | 1.71 | 0.04710 |
| 99  | ENSMUSG00000027170  | dendritic cell protein GA17. [Source:RefSeq;Acc:NM_145380]                                                               | gbctl04_plate17_F23 | 1.21 | 0.00402 | 1.93 | 0.00034 |
| 100 | ENSMUSG00000052062  | Amyotrophic lateral sclerosis 2 chromosome region candidate gene protein 19 homolog                                      | MTG_602468054       | 1.14 | 0.0228  | 1.99 | 0.00876 |
| 101 | ENSMUSG00000036879  |                                                                                                                          | MTG_602296393       | 1.56 | 0.00297 | 1.54 | 0.00289 |
| 102 | ENSMUSG00000031778  | Fractalkine precursor (CX3CL1) (Neurotactin) (CX3C membrane-anchored chemokine)                                          | MTG_602476781       | 1.26 | 0.00364 | 1.8  | 0.00049 |
| 103 | ENSMUSG00000035403  | 5930402A21 protein (Fragment). [Source:UniProt/SPTREMBL;Acc:Q80YA8]                                                      | MTG_602470194       | 1.76 | 0.00328 | 1.28 | 0.00709 |
| 104 | ENSMUSG00000001493  | Homeobox protein MOX-1 (Mesenchyme homeobox 1). [Source:UniProt/SWISSPROT;Acc:Q7TPD3]                                    | MTG_602474862       | 1.24 | 0.02044 | 1.76 | 0.02040 |
| 105 | ENSMUSG00000022817  | Integrin beta-5 precursor. [Source:UniProt/SWISSPROT;Acc:O70309]                                                         | MTG_602467875       | 1.22 | 0.00574 | 1.78 | 0.00790 |
| 106 | ENSMUSG00000037266  |                                                                                                                          | gbctl04_plate8_J22  | 1.45 | 0.0176  | 1.55 | 0.04280 |
| 107 | ENSMUSG00000015745  | TNF intracellular domain-interacting protein; CK2 interacting protein 1. [Source:RefSeq;Acc:Q7TPD3]                      | gbctl04_plate12_N03 | 1.93 | 0.00395 | 1.05 | 0.01250 |
| 108 | ENSMUSG00000022894  | ADAMTS-5 precursor (EC 3.4.24.-) (A disintegrin and metalloproteinase with thrombospondin type 1 motifs)                 | MTG_602469049       | 1.6  | 0.01184 | 1.35 | 0.04520 |
| 109 | ENSMUSG00000058056  | Strain Swiss Webster/NIH actin-associated protein palladin (Fragment). [Source:UniProt/SWISSPROT;Acc:Q7TPD3]             | gbctl04_plate11_D16 | 1.24 | 0.00354 | 1.71 | 0.00126 |
| 110 | ENSMUSG00000026584  | ezrin-binding partner PACE-1. [Source:RefSeq;Acc:NM_028776]                                                              | MTG_602471190       | 1.52 | 0.00354 | 1.41 | 0.00165 |
| 111 | ENSMUSG00000039706  | LIM domain binding 2. [Source:RefSeq;Acc:NM_010698]                                                                      | gbctl04_plate14_N07 | 1.47 | 0.00948 | 1.46 | 0.00324 |
| 112 | ENSMUSG00000020601  | tribbles homolog 2. [Source:RefSeq;Acc:NM_144551]                                                                        | MTG_602467572       | 1.37 | 0.00574 | 1.52 | 0.01990 |

|     |                    |                                                                                        |                     |      |          |      |         |
|-----|--------------------|----------------------------------------------------------------------------------------|---------------------|------|----------|------|---------|
| 113 | ENSMUSG00000013833 | thyroid hormone receptor associated protein 5; thyroid hormone receptor-associated     | MTG_602469016       | 1.43 | 0.00303  | 1.4  | 0.00369 |
| 114 | ENSMUSG00000022579 | 1110002J19Rik protein (High density lipoprotein binding protein 1). [Source:Uniprot/   | gbctl04_plate15_B13 | 1.37 | 0.0401   | 1.46 | 0.04120 |
| 115 | ENSMUSG00000019857 | ASF1 anti-silencing function 1 homolog A. [Source:RefSeq;Acc:NM_025541                 | gbctl04_plate10_J02 | 1.43 | 0.00302  | 1.39 | 0.01260 |
| 116 | ENSMUSG00000064326 | Apoptosis regulatory protein Siva (CD27-binding protein) (CD27BP). [Source:Uniprot     | MTG_602477616       | 1.42 | 0.00428  | 1.39 | 0.01100 |
| 117 | ENSMUSG00000020520 | UDP-N-acetyl-alpha-D-galactosamine:polypeptide N-acetyl[galactosaminyl]transferase     | MTG_602475529       | 1.74 | 0.0026   | 1.05 | 0.00624 |
| 118 | ENSMUSG00000052837 | Transcription factor jun-B. [Source:Uniprot/SWISSPROT;Acc:P09450]                      | MTG_602472486       | 1.2  | 0.00815  | 1.58 | 0.00829 |
| 119 | ENSMUSG00000048878 | cardiac lineage protein 1. [Source:RefSeq;Acc:NM_138753]                               | MTG_602470118       | 1.49 | 0.009    | 1.27 | 0.01990 |
| 120 | ENSMUSG00000057301 |                                                                                        | MTG_602476681       | 1.19 | 0.00367  | 1.57 | 0.00510 |
| 121 | ENSMUSG00000002250 | Peroxisome proliferator activated receptor delta (PPAR-delta) (PPAR- beta) (Nuclear    | MTG_602476773       | 1.23 | 0.00422  | 1.5  | 0.00125 |
| 122 | ENSMUSG00000058799 | Nucleosome assembly protein 1-like 1 (NAP-1 related protein) (Brain protein DN38).     | MTG_602469448       | 1.13 | 0.01946  | 1.59 | 0.00322 |
| 123 | ENSMUSG00000026672 | optineurin; TFIIIA-INTP. [Source:RefSeq;Acc:NM_181848]                                 | MTG_602296315       | 1.16 | 0.00635  | 1.45 | 0.00893 |
| 124 | ENSMUSG00000039628 |                                                                                        | MTG_602467022       | 1.06 | 0.01288  | 1.54 | 0.00666 |
| 125 | ENSMUSG00000008348 | Ubiquitin. [Source:Uniprot/SWISSPROT;Acc:P02248]                                       | gbctl04_plate6_P06  | 1.15 | 0.00569  | 1.45 | 0.00133 |
| 126 | ENSMUSG00000020121 | SLIT-ROBO Rho GTPase activating protein 1 (srGAP1) (Rho-GTPase- activating pro         | gbctl04_plate12_O13 | 1.05 | 0.00772  | 1.54 | 0.01290 |
| 127 | ENSMUSG00000052105 |                                                                                        | MTG_602467135       | 1.37 | 0.00708  | 1.2  | 0.01630 |
| 128 | ENSMUSG00000040003 | Atrophen-1 interacting protein 1 (Membrane associated guanylate kinase inverted-2)     | MTG_602473284       | 1.33 | 0.00426  | 1.22 | 0.01440 |
| 129 | ENSMUSG00000021112 | MAGUK p55 subfamily member 5 (Protein associated with Lin-7 1). [Source:Uniprot/       | MTG_602468154       | 1.22 | 0.00347  | 1.32 | 0.00496 |
| 130 | ENSMUSG00000042675 | Yippee-like protein 3. [Source:Uniprot/SWISSPROT;Acc:P61237]                           | MTG_602476328       | 1.21 | 0.02145  | 1.32 | 0.02920 |
| 131 | ENSMUSG00000050212 |                                                                                        | gbctl04_plate8_G02  | 1.21 | 0.00609  | 1.29 | 0.00568 |
| 132 | ENSMUSG00000022122 | Endothelin B receptor precursor (ET-B) (Endothelin receptor Non- selective type). [S   | gbctl04_plate11_C08 | 1.24 | 0.03716  | 1.23 | 0.02950 |
| 133 | ENSMUSG00000000934 | DNA topoisomerase I. [Source:Uniprot/SPTREMBL;Acc:Q8R4U6]                              | MTG_602476161       | 1.17 | 0.0278   | 1.29 | 0.02810 |
| 134 | ENSMUSG00000054203 | interferon activated gene 205; interferon-activatable protein 205-like. [Source:RefSeq | MTG_602474876       | 1.35 | 0.03053  | 1.11 | 0.03050 |
| 135 | ENSMUSG00000029070 | limitrin. [Source:RefSeq;Acc:NM_024263]                                                | MTG_602469209       | 1.17 | 0.00597  | 1.27 | 0.00298 |
| 136 | ENSMUSG00000060985 |                                                                                        | MTG_602471140       | 1.32 | 0.00303  | 1.03 | 0.04660 |
| 137 | ENSMUSG00000029638 | glucocorticoid induced transcript 1; testhymim; thymocyte/spermatocyte selection 1. [  | MTG_602467575       | 1.21 | 0.03079  | 1.11 | 0.03240 |
| 138 | ENSMUSG00000056748 |                                                                                        | gbctl04_plate12_K16 | 1.05 | 0.02941  | 1.22 | 0.00879 |
| 139 | ENSMUSG00000058865 |                                                                                        | MTG_602467063       | 1.07 | 0.02394  | 1.19 | 0.01270 |
| 140 | ENSMUSG00000022505 | Epithelial membrane protein-2 (EMP-2) (XMP protein). [Source:Uniprot/SWISSPROT         | MTG_602475342       | 1.05 | 0.00556  | 1.16 | 0.00902 |
| 141 | ENSMUSG00000000325 | Armadillo repeat protein deleted in velo-cardio-facial syndrome homolog (Fragment).    | MTG_602296391       | 1.19 | 0.00639  | 1.01 | 0.04840 |
| 142 | ENSMUSG00000027777 | schwannomin interacting protein 1; neurofibromatosis 2 interacting protein. [Source:F  | MTG_602472953       | 1.1  | 0.00665  | 1.09 | 0.02290 |
| 143 | ENSMUSG00000026712 | mannose receptor, C type 1. [Source:RefSeq;Acc:NM_008625]                              | MTG_602467778       | 1.04 | 0.00551  | 1.12 | 0.00342 |
| 1   | EST                |                                                                                        | gbctl04_plate7_K14  | 2.49 | 0.006303 | 3.26 | 0.00018 |
| 2   | EST                |                                                                                        | gbctl04_plate5_L23  | 2.45 | 0.013272 | 3.09 | 0.00057 |
| 3   | EST                |                                                                                        | MTG_602469520       | 2.27 | 0.00239  | 3.2  | 0.00003 |
| 4   | EST                |                                                                                        | MTG_602310626       | 1.02 | 0.045325 | 4.23 | 0.00006 |
| 5   | EST                |                                                                                        | gbctl04_plate4_O08  | 2.24 | 0.009017 | 2.95 | 0.00033 |
| 6   | EST                |                                                                                        | MTG_602467023       | 2.28 | 0.002723 | 2.79 | 0.00079 |
| 7   | EST                |                                                                                        | gbctl04_plate3_L22  | 1.99 | 0.01192  | 2.99 | 0.00033 |
| 8   | EST                |                                                                                        | gbctl04_plate15_K17 | 2.7  | 0.00239  | 2.01 | 0.02950 |
| 9   | EST                |                                                                                        | gbctl04_plate10_D02 | 2.09 | 0.003032 | 2.43 | 0.00006 |
| 10  | EST                |                                                                                        | MTG_602473406       | 2.06 | 0.00239  | 2.45 | 0.00473 |
| 11  | EST                |                                                                                        | gbctl04_plate8_M14  | 2.19 | 0.002642 | 2.25 | 0.00465 |
| 12  | EST                |                                                                                        | gbctl04_plate5_M19  | 2.49 | 0.00239  | 1.91 | 0.00145 |
| 13  | EST                |                                                                                        | MTG_602471429       | 1.5  | 0.00302  | 2.67 | 0.00388 |
| 14  | EST                |                                                                                        | MTG_602474109       | 2.2  | 0.002577 | 1.92 | 0.02240 |
| 15  | EST                |                                                                                        | MTG_602470178       | 1.93 | 0.020682 | 1.98 | 0.00243 |
| 16  | EST                |                                                                                        | gbctl04_plate13_C03 | 1.71 | 0.009746 | 2.13 | 0.01180 |
| 17  | EST                |                                                                                        | MTG_602473630       | 1.55 | 0.030634 | 2.14 | 0.00853 |
| 18  | EST                |                                                                                        | gbctl04_plate3_L13  | 1.82 | 0.027714 | 1.85 | 0.01930 |
| 19  | EST                |                                                                                        | gbctl04_plate6_O05  | 2.15 | 0.00239  | 1.45 | 0.00879 |
| 20  | EST                |                                                                                        | gbctl04_plate14_K23 | 1.6  | 0.006993 | 1.73 | 0.00091 |
| 21  | EST                |                                                                                        | MTG_602476601       | 1.41 | 0.025245 | 1.87 | 0.04820 |
| 22  | EST                |                                                                                        | MTG_602471282       | 1.56 | 0.002723 | 1.7  | 0.03220 |
| 23  | EST                |                                                                                        | MTG_602473845       | 1.53 | 0.002723 | 1.63 | 0.00343 |
| 24  | EST                |                                                                                        | MTG_602470345       | 1.26 | 0.003671 | 1.88 | 0.03860 |
| 25  | EST                |                                                                                        | MTG_602138935       | 1.14 | 0.031845 | 1.93 | 0.00258 |
| 26  | EST                |                                                                                        | MTG_602474350       | 1.73 | 0.004031 | 1.32 | 0.03490 |
| 27  | EST                |                                                                                        | MTG_602467858       | 1.53 | 0.003055 | 1.41 | 0.01210 |

|    |     |                     |      |          |      |         |
|----|-----|---------------------|------|----------|------|---------|
| 28 | EST | MTG_602477647       | 1.16 | 0.049493 | 1.65 | 0.00823 |
| 29 | EST | gbctI04_plate14_F05 | 1.34 | 0.01129  | 1.46 | 0.01150 |
| 30 | EST | MTG_602467148       | 1.43 | 0.003032 | 1.33 | 0.00484 |
| 31 | EST | MTG_602476817       | 1.04 | 0.009021 | 1.46 | 0.00187 |
| 32 | EST | MTG_602471153       | 1.21 | 0.004895 | 1.25 | 0.01320 |
| 33 | EST | MTG_602468449       | 1.19 | 0.009021 | 1.13 | 0.02520 |
| 34 | EST | MTG_602473237       | 1.09 | 0.008067 | 1.2  | 0.00817 |

Table S5

*List of category 3 genes in Fig.1C.*
